# Supplementary material for: Prognostic Value of Long Noncoding RNA SNHG12 in Various Carcinomas: A Meta-Analysis
Source: Biomed Res Int. 2020 Nov 26;2020:8847401. doi: 10.1155/2020/8847401 (PMC7716752; doi:10.1155/2020/8847401)
Supplement: Supplementary 2 — Supplementary Table S1. The detailed example of the full electronic search strategy for PubMed. Supplementary Table S2: PRISMA Checklist. [file 8847401.f2.zip]

Archive with 2 entries (2 files):
- Supplementary Table S1.docx
- Supplementary Table S2.docx
